# Supplementary material for: Nutritional Interventions to Improve Cachexia Outcomes in Cancer—A Systematic Review
Source: MDPI journal article supplement (doi:10.3390/medicina58070966), 2022-07-21
Supplement: s1 [file s1]

## Characteristics of studies

### Characteristics of included studies

#### *Akita et al. 2019*

|                      |                                                                                                                                                                                                                                      |
|----------------------|--------------------------------------------------------------------------------------------------------------------------------------------------------------------------------------------------------------------------------------|
| <b>Methods</b>       | prospective randomized control study                                                                                                                                                                                                 |
| <b>Participants</b>  | 62 patients randomly assigned to either a nutrition intervention (NI) group (n = 31) or a normal diet (ND) group (n =31)                                                                                                             |
| <b>Interventions</b> | eicosapentaenoic acid (EPA)                                                                                                                                                                                                          |
| <b>Outcomes</b>      | the pre-to-post ratios (post/pre) of skeletal muscle mass and PMA, the post/pre ratios of other nutritional parameters (serum pre-albumin, serum albumin, BMI, and lymphocyte count, and the severity of treatment-related toxicity) |
| <b>Notes</b>         |                                                                                                                                                                                                                                      |

### Risk of bias table

| Bias                                                      | Authors' judgement | Support for judgement                                                        |
|-----------------------------------------------------------|--------------------|------------------------------------------------------------------------------|
| Random sequence generation (selection bias)               | Low risk           | stratified by the severity of diabetes mellitus and Glasgow Prognostic Score |
| Allocation concealment (selection bias)                   | Low risk           | random allocation                                                            |
| Blinding of participants and personnel (performance bias) | High risk          | open label                                                                   |
| Blinding of outcome assessment (detection bias)           | High risk          | open label                                                                   |
| Incomplete outcome data (attrition bias)                  | Low risk           | data is recorded for all patients                                            |
| Selective reporting (reporting bias)                      | Low risk           | all prespecified outcomes were reported                                      |
| Other bias                                                | High risk          | 31 patients in the treatment arm                                             |

#### *Barber et al. 1999*

|                      |                             |
|----------------------|-----------------------------|
| <b>Methods</b>       | clinical trial              |
| <b>Participants</b>  | 20 patients                 |
| <b>Interventions</b> | eicosapentaenoic acid (EPA) |

|                 |                                                                                                                 |
|-----------------|-----------------------------------------------------------------------------------------------------------------|
| <b>Outcomes</b> | weight gain (weight, body composition, dietary intake, resting energy expenditure (REE) and performance status) |
| <b>Notes</b>    |                                                                                                                 |

## Risk of bias table

| Bias                                                      | Authors' judgement | Support for judgement                                |
|-----------------------------------------------------------|--------------------|------------------------------------------------------|
| Random sequence generation (selection bias)               | High risk          | no randomization                                     |
| Allocation concealment (selection bias)                   | Low risk           | patients with unresectable pancreatic adenocarcinoma |
| Blinding of participants and personnel (performance bias) | High risk          | open label                                           |
| Blinding of outcome assessment (detection bias)           | High risk          | open label                                           |
| Incomplete outcome data (attrition bias)                  | Low risk           | data is recorded for all patients                    |
| Selective reporting (reporting bias)                      | Low risk           | all prespecified outcomes were reported              |
| Other bias                                                | High risk          | 20 patients included                                 |

*Bayram et al. 2009*

|                      |                                                          |
|----------------------|----------------------------------------------------------|
| <b>Methods</b>       | prospective, randomized, single-center, open label study |
| <b>Participants</b>  | 52 pediatric patients                                    |
| <b>Interventions</b> | eicosapentaenoic acid (EPA)                              |
| <b>Outcomes</b>      | body weight, body mass index, and weight percentile      |
| <b>Notes</b>         |                                                          |

## Risk of bias table

| Bias                                                      | Authors' judgement | Support for judgement    |
|-----------------------------------------------------------|--------------------|--------------------------|
| Random sequence generation (selection bias)               | Low risk           | 2:1 randomization scheme |
| Allocation concealment (selection bias)                   | Low risk           | random allocation        |
| Blinding of participants and personnel (performance bias) | High risk          | open label               |
| Blinding of outcome assessment (detection bias)           | High risk          | open label               |

|                                          |           |                                         |
|------------------------------------------|-----------|-----------------------------------------|
| Incomplete outcome data (attrition bias) | Low risk  | data is recorded for all patients       |
| Selective reporting (reporting bias)     | Low risk  | all prespecified outcomes were reported |
| Other bias                               | High risk | 33 patients in the treatment arm        |

**Berk et al. 2008**

|                      |                                                                                                                                                                                                                                                                |
|----------------------|----------------------------------------------------------------------------------------------------------------------------------------------------------------------------------------------------------------------------------------------------------------|
| <b>Methods</b>       | randomized, double-blind, placebo-controlled trial                                                                                                                                                                                                             |
| <b>Participants</b>  | 472 patients                                                                                                                                                                                                                                                   |
| <b>Interventions</b> | 3 g of HMB, 14 g arginine, and 14 g of glutamine or placebo - an isonitrogenous, isocaloric mixture to the HMB/Arg/Gln containing 7.72 g l-alanine, 4.28 g glycine, 2.96 g l-serine, 1.23 g l-glutamic acid, and 30.52 g gelatin taken twice a day for 8 weeks |
| <b>Outcomes</b>      | the percent of change in lean body mass, body plethysmography, weight, the Schwartz Fatigue Scale, and the Spitzer Quality of Life Scale                                                                                                                       |
| <b>Notes</b>         |                                                                                                                                                                                                                                                                |

**Risk of bias table**

| Bias                                                      | Authors' judgement | Support for judgement                   |
|-----------------------------------------------------------|--------------------|-----------------------------------------|
| Random sequence generation (selection bias)               | Unclear risk       | not specified                           |
| Allocation concealment (selection bias)                   | Low risk           | random allocation                       |
| Blinding of participants and personnel (performance bias) | Low risk           | double blind                            |
| Blinding of outcome assessment (detection bias)           | Low risk           | double blind                            |
| Incomplete outcome data (attrition bias)                  | Low risk           | data is recorded for all patients       |
| Selective reporting (reporting bias)                      | Low risk           | all prespecified outcomes were reported |
| Other bias                                                | Unclear risk       | 235 patients in the treatment arm       |

**Bruera et al. 2003**

|                      |                                                                                                                           |
|----------------------|---------------------------------------------------------------------------------------------------------------------------|
| <b>Methods</b>       | randomized, double-blind, placebo-controlled trial                                                                        |
| <b>Participants</b>  | 91 patients                                                                                                               |
| <b>Interventions</b> | 180 mg of eicosapentaenoic acid (EPA), 120 mg of docosahexaenoic acid [DHA], and 1 mg of vitamin E or placebo - olive oil |

|                 |                                                                                           |
|-----------------|-------------------------------------------------------------------------------------------|
| <b>Outcomes</b> | Appetite, tiredness, nausea, well-being, caloric intake, nutritional status, and function |
| <b>Notes</b>    |                                                                                           |

## Risk of bias table

| Bias                                                      | Authors' judgement | Support for judgement                   |
|-----------------------------------------------------------|--------------------|-----------------------------------------|
| Random sequence generation (selection bias)               | Unclear risk       | not specified                           |
| Allocation concealment (selection bias)                   | Low risk           | random allocation                       |
| Blinding of participants and personnel (performance bias) | Low risk           | double blind                            |
| Blinding of outcome assessment (detection bias)           | Low risk           | double blind                            |
| Incomplete outcome data (attrition bias)                  | Low risk           | data is recorded for all patients       |
| Selective reporting (reporting bias)                      | Low risk           | all prespecified outcomes were reported |
| Other bias                                                | High risk          | 46 patients in the treatment arm        |

*Burden et al. 2017*

|                      |                                                                                                                                                                                        |
|----------------------|----------------------------------------------------------------------------------------------------------------------------------------------------------------------------------------|
| <b>Methods</b>       | single-blind randomized controlled trial                                                                                                                                               |
| <b>Participants</b>  | 101 patients                                                                                                                                                                           |
| <b>Interventions</b> | Intervention group was given 250 mL/day oral nutrition supplements (10.1 KJ and 0.096 g protein per mL) and dietary advice. Control group received dietary advice alone                |
| <b>Outcomes</b>      | patients with one or more surgical site infection (SSI) or chest infection; secondary outcomes included percentage weight loss, total complications, and body composition measurements |
| <b>Notes</b>         |                                                                                                                                                                                        |

## Risk of bias table

| Bias                                        | Authors' judgement | Support for judgement                                                 |
|---------------------------------------------|--------------------|-----------------------------------------------------------------------|
| Random sequence generation (selection bias) | Low risk           | 1:1 ratio by using blocks of two ensuring equal numbers in each group |
| Allocation concealment (selection bias)     | Low risk           | sequentially numbered opaque sealed envelopes                         |

|                                                           |              |                                                                                |
|-----------------------------------------------------------|--------------|--------------------------------------------------------------------------------|
| Blinding of participants and personnel (performance bias) | Low risk     | The research team was blind to the intervention, but the participants were not |
| Blinding of outcome assessment (detection bias)           | Low risk     | double blind                                                                   |
| Incomplete outcome data (attrition bias)                  | Low risk     | data is recorded for all patients                                              |
| Selective reporting (reporting bias)                      | Low risk     | all prespecified outcomes were reported                                        |
| Other bias                                                | Unclear risk | 55 patients in the treatment arm                                               |

***Candela et al. 2011***

|                      |                                                                                                                                                                                                                                                                                            |
|----------------------|--------------------------------------------------------------------------------------------------------------------------------------------------------------------------------------------------------------------------------------------------------------------------------------------|
| <b>Methods</b>       | randomized placebo-controlled trial                                                                                                                                                                                                                                                        |
| <b>Participants</b>  | 61 patients                                                                                                                                                                                                                                                                                |
| <b>Interventions</b> | an oral powder supplement enriched with eicosapentaenoic acid (EPA) compared to a standard liquid supplement                                                                                                                                                                               |
| <b>Outcomes</b>      | the Patient-Generated Subjective Global Assessment (pg-SGA), anthropometric measurements (skin folds, circumferences and bioimpedance), dietary parameters (3-day food record), biochemical and inflammatory parameters (basic biochemistry, cytokines, prealbumin and Reactive C Protein) |
| <b>Notes</b>         |                                                                                                                                                                                                                                                                                            |

**Risk of bias table**

| Bias                                                      | Authors' judgement | Support for judgement                   |
|-----------------------------------------------------------|--------------------|-----------------------------------------|
| Random sequence generation (selection bias)               | Unclear risk       | not specified                           |
| Allocation concealment (selection bias)                   | Low risk           | random allocation                       |
| Blinding of participants and personnel (performance bias) | High risk          | open label                              |
| Blinding of outcome assessment (detection bias)           | High risk          | open label                              |
| Incomplete outcome data (attrition bias)                  | Low risk           | data is recorded for all patients       |
| Selective reporting (reporting bias)                      | Low risk           | all prespecified outcomes were reported |
| Other bias                                                | High risk          | 16 patients in the treatment arm        |

**Engelen et al. 2015**

|                      |                                                                                                                                                         |
|----------------------|---------------------------------------------------------------------------------------------------------------------------------------------------------|
| <b>Methods</b>       | randomized double blind cross-over design                                                                                                               |
| <b>Participants</b>  | 24 patients                                                                                                                                             |
| <b>Interventions</b> | 14 g of free EAA with high leucine levels (EAA/leucine) versus a balanced amino acid mixture containing both EAA and non-EAA as present in whey protein |
| <b>Outcomes</b>      | Body weight, height, fat, and fat-free mass (FFM), respiratory muscle function, handgrip strength, and endurance. Protein anabolism                     |
| <b>Notes</b>         |                                                                                                                                                         |

**Risk of bias table**

| <b>Bias</b>                                               | <b>Authors' judgement</b> | <b>Support for judgement</b>            |
|-----------------------------------------------------------|---------------------------|-----------------------------------------|
| Random sequence generation (selection bias)               | Unclear risk              | not specified                           |
| Allocation concealment (selection bias)                   | Low risk                  | random allocation                       |
| Blinding of participants and personnel (performance bias) | Low risk                  | double blind cross-over design          |
| Blinding of outcome assessment (detection bias)           | Low risk                  | double blind cross-over design          |
| Incomplete outcome data (attrition bias)                  | Low risk                  | data is recorded for all patients       |
| Selective reporting (reporting bias)                      | Low risk                  | all prespecified outcomes were reported |
| Other bias                                                | High risk                 | 13 patients in the treatment arm        |

**Hanai et al. 2018**

|                      |                                                                                                                                                                                                                                                                                                     |
|----------------------|-----------------------------------------------------------------------------------------------------------------------------------------------------------------------------------------------------------------------------------------------------------------------------------------------------|
| <b>Methods</b>       | prospective randomized controlled study                                                                                                                                                                                                                                                             |
| <b>Participants</b>  | 28 patients                                                                                                                                                                                                                                                                                         |
| <b>Interventions</b> | EPA-enriched oral nutritional supplement (Prosure®) or no dietary intervention                                                                                                                                                                                                                      |
| <b>Outcomes</b>      | the postoperative nutritional status (weight, lean body mass, albumin, prealbumin), while the secondary endpoints included inflammatory marker levels (CRP, IL6, white blood cell count, body temperature), compliance with the Prosure® dosage, and the occurrence of postoperative complications. |
| <b>Notes</b>         |                                                                                                                                                                                                                                                                                                     |

## Risk of bias table

| Bias                                                      | Authors' judgement | Support for judgement                   |
|-----------------------------------------------------------|--------------------|-----------------------------------------|
| Random sequence generation (selection bias)               | Unclear risk       | not specified                           |
| Allocation concealment (selection bias)                   | Low risk           | random allocation                       |
| Blinding of participants and personnel (performance bias) | High risk          | open label                              |
| Blinding of outcome assessment (detection bias)           | High risk          | open label                              |
| Incomplete outcome data (attrition bias)                  | Low risk           | data is recorded for all patients       |
| Selective reporting (reporting bias)                      | Low risk           | all prespecified outcomes were reported |
| Other bias                                                | High risk          | 14 patients in the treatment arm        |

*Jatoi et al. 2004*

|                      |                                                                                                                                                                       |
|----------------------|-----------------------------------------------------------------------------------------------------------------------------------------------------------------------|
| <b>Methods</b>       | double-blinded, placebo-controlled trial                                                                                                                              |
| <b>Participants</b>  | 421 patients                                                                                                                                                          |
| <b>Interventions</b> | an EPA supplement 1.09 g administered bid plus placebo; MA liquid suspension 600 mg/d plus an isocaloric, isonitrogenous supplement administered twice a day; or both |
| <b>Outcomes</b>      | a 10% weight gain above baseline                                                                                                                                      |
| <b>Notes</b>         |                                                                                                                                                                       |

## Risk of bias table

| Bias                                                      | Authors' judgement | Support for judgement                                                                                      |
|-----------------------------------------------------------|--------------------|------------------------------------------------------------------------------------------------------------|
| Random sequence generation (selection bias)               | Low risk           | The stratification process used here was a minimization algorithm that balances the marginal distributions |
| Allocation concealment (selection bias)                   | Low risk           | random allocation                                                                                          |
| Blinding of participants and personnel (performance bias) | Low risk           | double blind                                                                                               |
| Blinding of outcome assessment (detection bias)           | Low risk           | double blind                                                                                               |

|                                          |          |                                             |
|------------------------------------------|----------|---------------------------------------------|
| Incomplete outcome data (attrition bias) | Low risk | data is recorded for all patients           |
| Selective reporting (reporting bias)     | Low risk | all prespecified outcomes were reported     |
| Other bias                               | Low risk | more than 200 patients in the treatment arm |

***Kraft et al. 2012***

|                      |                                                                                                                                                   |
|----------------------|---------------------------------------------------------------------------------------------------------------------------------------------------|
| <b>Methods</b>       | prospective, multi-centre, placebo-controlled, randomized and double-blinded trial                                                                |
| <b>Participants</b>  | 72 patients                                                                                                                                       |
| <b>Interventions</b> | oral L-Carnitine (4 g) or placebo for 12 weeks                                                                                                    |
| <b>Outcomes</b>      | adverse effects, quality of life, fatigue, BMI, body composition, survival time, changes in L-carnitine level, CRP, albumine, leucocytes, CA 19-9 |
| <b>Notes</b>         |                                                                                                                                                   |

**Risk of bias table**

| Bias                                                      | Authors' judgement | Support for judgement                                   |
|-----------------------------------------------------------|--------------------|---------------------------------------------------------|
| Random sequence generation (selection bias)               | Low risk           | sequential series of 4 per block                        |
| Allocation concealment (selection bias)                   | Low risk           | computer generated randomization code, sealed envelopes |
| Blinding of participants and personnel (performance bias) | Low risk           | double blind                                            |
| Blinding of outcome assessment (detection bias)           | Low risk           | double blind                                            |
| Incomplete outcome data (attrition bias)                  | Low risk           | data is recorded for all patients                       |
| Selective reporting (reporting bias)                      | Low risk           | all prespecified outcomes were reported                 |
| Other bias                                                | High risk          | 38 patients in the treatment arm                        |

***Kun-Yun Yeh et al 2013***

|                      |                                                                                                                                                 |
|----------------------|-------------------------------------------------------------------------------------------------------------------------------------------------|
| <b>Methods</b>       | prospective randomized placebo-controlled clinical trial                                                                                        |
| <b>Participants</b>  | 68 patients                                                                                                                                     |
| <b>Interventions</b> | an Ethanwell/Ethanzyme (EE) regimen enriched with omega-3 fatty acids, micronutrients, and probiotics, or control (Isocal) for a 3-month period |
| <b>Outcomes</b>      | body weight (BW) changes, serum albumin and prealbumin levels                                                                                   |
| <b>Notes</b>         |                                                                                                                                                 |



## Risk of bias table

| Bias                                                      | Authors' judgement | Support for judgement                   |
|-----------------------------------------------------------|--------------------|-----------------------------------------|
| Random sequence generation (selection bias)               | Low risk           | 1:1 ratio                               |
| Allocation concealment (selection bias)                   | Low risk           | random allocation, sealed envelopes     |
| Blinding of participants and personnel (performance bias) | Unclear risk       | not specified                           |
| Blinding of outcome assessment (detection bias)           | Unclear risk       | not specified                           |
| Incomplete outcome data (attrition bias)                  | Low risk           | data is recorded for all patients       |
| Selective reporting (reporting bias)                      | Low risk           | all prespecified outcomes were reported |
| Other bias                                                | High risk          | 31 patients in the treatment arm        |

*Martinez et al. 2018*

|                      |                                                                                                                                                                                |
|----------------------|--------------------------------------------------------------------------------------------------------------------------------------------------------------------------------|
| <b>Methods</b>       | randomized single-blind placebo-controlled clinical trial                                                                                                                      |
| <b>Participants</b>  | 64 patients                                                                                                                                                                    |
| <b>Interventions</b> | Eicosapentaenoic acid (EPA)                                                                                                                                                    |
| <b>Outcomes</b>      | body composition by bioelectrical impedance analysis and determined IL-1b, IL-6, TNF-a and IFN-g, CRP, serum proteins, and blood count at baseline and at the end of the study |
| <b>Notes</b>         |                                                                                                                                                                                |

## Risk of bias table

| Bias                                                      | Authors' judgement | Support for judgement                   |
|-----------------------------------------------------------|--------------------|-----------------------------------------|
| Random sequence generation (selection bias)               | Unclear risk       | not specified                           |
| Allocation concealment (selection bias)                   | Low risk           | random allocation                       |
| Blinding of participants and personnel (performance bias) | Low risk           | single blind                            |
| Blinding of outcome assessment (detection bias)           | Unclear risk       | single blind                            |
| Incomplete outcome data (attrition bias)                  | Low risk           | data is recorded for all patients       |
| Selective reporting (reporting bias)                      | Low risk           | all prespecified outcomes were reported |
| Other bias                                                | High risk          | 32 patients in the treatment arm        |

**May et al. 2002**

|                      |                                                                                                                                                              |
|----------------------|--------------------------------------------------------------------------------------------------------------------------------------------------------------|
| <b>Methods</b>       | randomized double-blind placebo-controlled clinical trial                                                                                                    |
| <b>Participants</b>  | 49 patients                                                                                                                                                  |
| <b>Interventions</b> | oral supplementation with a combination of hydroxy--methylbutyrate, arginine, and glutamine or an isonitrogenous control mixture of nonessential amino acids |
| <b>Outcomes</b>      | the change in body mass and fat-free mass (FFM)                                                                                                              |
| <b>Notes</b>         |                                                                                                                                                              |

**Risk of bias table**

| <b>Bias</b>                                               | <b>Authors' judgement</b> | <b>Support for judgement</b>                                                               |
|-----------------------------------------------------------|---------------------------|--------------------------------------------------------------------------------------------|
| Random sequence generation (selection bias)               | Low risk                  | computer-generated random numbers                                                          |
| Allocation concealment (selection bias)                   | Low risk                  | computer-generated random numbers prior to the start of the study in a doubleblind fashion |
| Blinding of participants and personnel (performance bias) | Low risk                  | double blind                                                                               |
| Blinding of outcome assessment (detection bias)           | Unclear risk              | double blind                                                                               |
| Incomplete outcome data (attrition bias)                  | Low risk                  | data is recorded for all patients                                                          |
| Selective reporting (reporting bias)                      | Low risk                  | all prespecified outcomes were reported                                                    |
| Other bias                                                | High risk                 | 18 patients in the treatment arm                                                           |

**Palma et al. 2015**

|                      |                                                                                                                                                                              |
|----------------------|------------------------------------------------------------------------------------------------------------------------------------------------------------------------------|
| <b>Methods</b>       | clinical trial (Simon model)                                                                                                                                                 |
| <b>Participants</b>  | 30 patients                                                                                                                                                                  |
| <b>Interventions</b> | 50 mg of the crude dry extract of guarana twice a day for 4 weeks                                                                                                            |
| <b>Outcomes</b>      | a positive response in the first phase to be at least 5% weight gain or a three-point improvement in the appetite scale in at least three of the first 18 evaluable patients |
| <b>Notes</b>         |                                                                                                                                                                              |

## Risk of bias table

| Bias                                                      | Authors' judgement | Support for judgement                   |
|-----------------------------------------------------------|--------------------|-----------------------------------------|
| Random sequence generation (selection bias)               | Unclear risk       | nonrandomized trial                     |
| Allocation concealment (selection bias)                   | Unclear risk       | nonrandomized trial                     |
| Blinding of participants and personnel (performance bias) | Unclear risk       | open label                              |
| Blinding of outcome assessment (detection bias)           | Unclear risk       | open label                              |
| Incomplete outcome data (attrition bias)                  | Low risk           | data is recorded for all patients       |
| Selective reporting (reporting bias)                      | Low risk           | all prespecified outcomes were reported |
| Other bias                                                | High risk          | 18 patients completed the protocol      |

*Persson et al. 2005*

|                      |                                                                                                                                                                                                                                   |
|----------------------|-----------------------------------------------------------------------------------------------------------------------------------------------------------------------------------------------------------------------------------|
| <b>Methods</b>       | a one-center, randomized, non-placebo controlled, open study                                                                                                                                                                      |
| <b>Participants</b>  | 24 patients                                                                                                                                                                                                                       |
| <b>Interventions</b> | 4.9 g of eicosapentaenoic acid and 3.2 g of docosahexanoic acid, or 18 mg/d of melatonin for 4 week                                                                                                                               |
| <b>Outcomes</b>      | changes in tumor necrosis factor-alpha, interleukin-1beta, soluble interleukin-2 receptor, interleukin-6, and interleukin-8 and the fatty acids: eicosapentaenoic acid, docosahexanoic acid, arachidonic acid, and linoleic acid. |
| <b>Notes</b>         |                                                                                                                                                                                                                                   |

## Risk of bias table

| Bias                                                      | Authors' judgement | Support for judgement             |
|-----------------------------------------------------------|--------------------|-----------------------------------|
| Random sequence generation (selection bias)               | Unclear risk       | not specified                     |
| Allocation concealment (selection bias)                   | Low risk           | random allocation, non-placebo    |
| Blinding of participants and personnel (performance bias) | High risk          | open label                        |
| Blinding of outcome assessment (detection bias)           | High risk          | open label                        |
| Incomplete outcome data (attrition bias)                  | Low risk           | data is recorded for all patients |

|                                      |           |                                         |
|--------------------------------------|-----------|-----------------------------------------|
| Selective reporting (reporting bias) | Low risk  | all prespecified outcomes were reported |
| Other bias                           | High risk | 13 patients in the fish-oil arm         |

**Schmidt et al. 2019**

|                      |                                                                                                       |
|----------------------|-------------------------------------------------------------------------------------------------------|
| <b>Methods</b>       | non-randomized clinical trial                                                                         |
| <b>Participants</b>  | 41 patients                                                                                           |
| <b>Interventions</b> | a nutritional drink with fish-oil compared to an equivalent dose of fish-oil administered as capsules |
| <b>Outcomes</b>      | changes in whole blood n-3 LC PUFAs, weight, nutritional status, acceptability or side effects        |
| <b>Notes</b>         |                                                                                                       |

**Risk of bias table**

| Bias                                                      | Authors' judgement | Support for judgement                   |
|-----------------------------------------------------------|--------------------|-----------------------------------------|
| Random sequence generation (selection bias)               | Unclear risk       | non-randomized                          |
| Allocation concealment (selection bias)                   | Unclear risk       | non-randomized                          |
| Blinding of participants and personnel (performance bias) | Unclear risk       | open label                              |
| Blinding of outcome assessment (detection bias)           | Unclear risk       | open label                              |
| Incomplete outcome data (attrition bias)                  | Low risk           | data is recorded for all patients       |
| Selective reporting (reporting bias)                      | Low risk           | all prespecified outcomes were reported |
| Other bias                                                | High risk          | 13 patients included in the analysis    |

**Storck et al. 2020**

|                      |                                                                                                                                                  |
|----------------------|--------------------------------------------------------------------------------------------------------------------------------------------------|
| <b>Methods</b>       | randomized controlled intervention trial                                                                                                         |
| <b>Participants</b>  | 52 patients                                                                                                                                      |
| <b>Interventions</b> | a leucine-rich supplement in combination with a nutrition and physical exercise program versus standard care                                     |
| <b>Outcomes</b>      | changes in physical function, physical performance tests, nutritional status, dietary intake, fatigue, quality of life (QoL) and clinical course |

|       |  |
|-------|--|
| Notes |  |
|-------|--|

## Risk of bias table

| Bias                                                      | Authors' judgement | Support for judgement                                                                                                      |
|-----------------------------------------------------------|--------------------|----------------------------------------------------------------------------------------------------------------------------|
| Random sequence generation (selection bias)               | Low risk           | a 1:1 ratio using block sizes of six by the data management program secuTrial®                                             |
| Allocation concealment (selection bias)                   | Low risk           | stratified according to the site of their primary tumor (lung cancer, upper or lower gastrointestinal tract cancer, other) |
| Blinding of participants and personnel (performance bias) | Unclear risk       | not specified                                                                                                              |
| Blinding of outcome assessment (detection bias)           | Unclear risk       | not specified                                                                                                              |
| Incomplete outcome data (attrition bias)                  | Low risk           | data is recorded for all patients                                                                                          |
| Selective reporting (reporting bias)                      | Low risk           | all prespecified outcomes were reported                                                                                    |
| Other bias                                                | High risk          | 27 patients in the treatment arm                                                                                           |

*Strasser et al. 2006*

|               |                                                                                       |
|---------------|---------------------------------------------------------------------------------------|
| Methods       | a multicenter, phase III, randomized, double-Blind, placebo-controlled clinical trial |
| Participants  | 243 patients                                                                          |
| Interventions | cannabis extract (CE), delta-9-tetrahydrocannabinol (THC), and placebo                |
| Outcomes      | appetite, mood, nausea and quality of life (QOL)                                      |
| Notes         |                                                                                       |

## Risk of bias table

| Bias                                        | Authors' judgement | Support for judgement                                                                                                     |
|---------------------------------------------|--------------------|---------------------------------------------------------------------------------------------------------------------------|
| Random sequence generation (selection bias) | Low risk           | Random assignment lists, stratified by center, were prepared by a naive statistician using SAS software                   |
| Allocation concealment (selection bias)     | Low risk           | study drug sets in multiples of five, together with matching sealed envelopes containing individual treatment assignments |

|                                                           |              |                                                                                                                                                                                           |
|-----------------------------------------------------------|--------------|-------------------------------------------------------------------------------------------------------------------------------------------------------------------------------------------|
| Blinding of participants and personnel (performance bias) | Low risk     | Investigators remained blinded until the study ended, with individual unblinding permitted only for safety reasons.                                                                       |
| Blinding of outcome assessment (detection bias)           | Low risk     | The statistician and data manager who were managing random assignment, unblinding, and related decisions were naive to clinical evaluations and uninvolved in data management or analysis |
| Incomplete outcome data (attrition bias)                  | Low risk     | data is recorded for all patients                                                                                                                                                         |
| Selective reporting (reporting bias)                      | Low risk     | all prespecified outcomes were reported                                                                                                                                                   |
| Other bias                                                | Unclear risk | 164 patients in the treatment arm                                                                                                                                                         |

**Szefel et al. 2012**

|                      |                                                                                                                           |
|----------------------|---------------------------------------------------------------------------------------------------------------------------|
| <b>Methods</b>       | randomized clinical trial                                                                                                 |
| <b>Participants</b>  | 50 patients                                                                                                               |
| <b>Interventions</b> | total parenteral nutrition (TPN) with long-chain triglycerides (LCTs), or LCTs plus medium-chain triglycerides (MCTs)     |
| <b>Outcomes</b>      | L-Carnitine distribution and the effects of parenteral lipid emulsions on plasma L-Carnitine levels and urinary excretion |
| <b>Notes</b>         |                                                                                                                           |

**Risk of bias table**

| Bias                                                      | Authors' judgement | Support for judgement                                                                                                |
|-----------------------------------------------------------|--------------------|----------------------------------------------------------------------------------------------------------------------|
| Random sequence generation (selection bias)               | Low risk           | 50:50                                                                                                                |
| Allocation concealment (selection bias)                   | Low risk           | randomly divided into 2 groups according to the type of lipid emulsion they were administered: MCT/LCT vs. pure LCT. |
| Blinding of participants and personnel (performance bias) | Unclear risk       | not specified                                                                                                        |
| Blinding of outcome assessment (detection bias)           | Unclear risk       | not specified                                                                                                        |
| Incomplete outcome data (attrition bias)                  | Low risk           | data is recorded for all patients                                                                                    |

|                                      |           |                                         |
|--------------------------------------|-----------|-----------------------------------------|
| Selective reporting (reporting bias) | Low risk  | all prespecified outcomes were reported |
| Other bias                           | High risk | 25 patients in the treatment arm        |

**Tayek et al. 1986**

|                      |                                                                                                                                                                                   |
|----------------------|-----------------------------------------------------------------------------------------------------------------------------------------------------------------------------------|
| <b>Methods</b>       | A prospective randomized crossover trial                                                                                                                                          |
| <b>Participants</b>  | 10 patients                                                                                                                                                                       |
| <b>Interventions</b> | a conventional total parenteral nutrition (TPN) formula containing 19% branched chain amino acid (BCAA) and a BCAA-enriched TPN formula containing 50% of the amino acids as BCAA |
| <b>Outcomes</b>      | changes in the whole body leucine kinetics and fractional rates of albumin synthesis                                                                                              |
| <b>Notes</b>         |                                                                                                                                                                                   |

**Risk of bias table**

| Bias                                                      | Authors' judgement | Support for judgement                   |
|-----------------------------------------------------------|--------------------|-----------------------------------------|
| Random sequence generation (selection bias)               | Unclear risk       | not specified                           |
| Allocation concealment (selection bias)                   | Low risk           | random allocation                       |
| Blinding of participants and personnel (performance bias) | Unclear risk       | not specified                           |
| Blinding of outcome assessment (detection bias)           | Unclear risk       | not specified                           |
| Incomplete outcome data (attrition bias)                  | Low risk           | data is recorded for all patients       |
| Selective reporting (reporting bias)                      | Low risk           | all prespecified outcomes were reported |
| Other bias                                                | High risk          | 10 patients included in the study       |

**Taylor et al. 2009**

|                      |                                                                                                                 |
|----------------------|-----------------------------------------------------------------------------------------------------------------|
| <b>Methods</b>       | clinical trial                                                                                                  |
| <b>Participants</b>  | 31 patients                                                                                                     |
| <b>Interventions</b> | marine phospholipids (1.5 g/day) as softgel capsules for a period of 6 weeks                                    |
| <b>Outcomes</b>      | compliance, changes in body weight, appetite, and quality of life, fatty acid profile in plasma and blood cells |
| <b>Notes</b>         |                                                                                                                 |

## Risk of bias table

| Bias                                                      | Authors' judgement | Support for judgement                   |
|-----------------------------------------------------------|--------------------|-----------------------------------------|
| Random sequence generation (selection bias)               | High risk          | non-randomized                          |
| Allocation concealment (selection bias)                   | Unclear risk       | no selection                            |
| Blinding of participants and personnel (performance bias) | High risk          | open label                              |
| Blinding of outcome assessment (detection bias)           | High risk          | open label                              |
| Incomplete outcome data (attrition bias)                  | Low risk           | data is recorded for all patients       |
| Selective reporting (reporting bias)                      | Low risk           | all prespecified outcomes were reported |
| Other bias                                                | High risk          | 17 patients analyzed                    |

*Turcott et al. 2018*

|                      |                                                               |
|----------------------|---------------------------------------------------------------|
| <b>Methods</b>       | a randomized, double-blind, placebo-controlled clinical trial |
| <b>Participants</b>  | 47 patients                                                   |
| <b>Interventions</b> | Nabilone vs. placebo                                          |
| <b>Outcomes</b>      | appetite, nutritional status, and quality of life             |
| <b>Notes</b>         |                                                               |

## Risk of bias table

| Bias                                                      | Authors' judgement | Support for judgement                              |
|-----------------------------------------------------------|--------------------|----------------------------------------------------|
| Random sequence generation (selection bias)               | Unclear risk       | not specified                                      |
| Allocation concealment (selection bias)                   | Low risk           | random allocation                                  |
| Blinding of participants and personnel (performance bias) | Low risk           | double blind                                       |
| Blinding of outcome assessment (detection bias)           | Low risk           | double blind                                       |
| Incomplete outcome data (attrition bias)                  | Low risk           | data is recorded for all patients                  |
| Selective reporting (reporting bias)                      | Low risk           | all prespecified outcomes were reported            |
| Other bias                                                | High risk          | 9 patients in the treatment arm finished the study |



**Werner et al. 2017**

|                      |                                                                                                                                    |
|----------------------|------------------------------------------------------------------------------------------------------------------------------------|
| <b>Methods</b>       | a randomized controlled double blind trial                                                                                         |
| <b>Participants</b>  | 60 patients                                                                                                                        |
| <b>Interventions</b> | marine phospholipids versus fish oil                                                                                               |
| <b>Outcomes</b>      | compliance, quality of life, nutritional habits and changes in routine blood parameters, lipid profiles, body weight, and appetite |
| <b>Notes</b>         |                                                                                                                                    |

**Risk of bias table**

| <b>Bias</b>                                               | <b>Authors' judgement</b> | <b>Support for judgement</b>                                                                                                                                           |
|-----------------------------------------------------------|---------------------------|------------------------------------------------------------------------------------------------------------------------------------------------------------------------|
| Random sequence generation (selection bias)               | Low risk                  | not specified                                                                                                                                                          |
| Allocation concealment (selection bias)                   | Low risk                  | Randomization and masking was performed with assignment envelopes containing the letter A or B, which were prepared by a non-involved external party (Membramed GmbH). |
| Blinding of participants and personnel (performance bias) | Low risk                  | double blind                                                                                                                                                           |
| Blinding of outcome assessment (detection bias)           | Low risk                  | Assignment code was revealed at the end of the study by Membramed GmbH                                                                                                 |
| Incomplete outcome data (attrition bias)                  | Low risk                  | data is recorded for all patients                                                                                                                                      |
| Selective reporting (reporting bias)                      | Low risk                  | all prespecified outcomes were reported                                                                                                                                |
| Other bias                                                | High risk                 | 31 patients in the treatment arm                                                                                                                                       |

**Wigmore et al. 2000**

|                      |                                                                                                                                                            |
|----------------------|------------------------------------------------------------------------------------------------------------------------------------------------------------|
| <b>Methods</b>       | clinical trial                                                                                                                                             |
| <b>Participants</b>  | 26 patients                                                                                                                                                |
| <b>Interventions</b> | EPA at 1 g/day for the first week, 2 g/day for the second week, 4 g/day for the third week, and 6 g/day thereafter.                                        |
| <b>Outcomes</b>      | overall survival, changes in weight, body composition, hematologic and clinical chemistry variables, acute- phase protein response, and performance status |

|              |  |
|--------------|--|
| <b>Notes</b> |  |
|--------------|--|

## Risk of bias table

| Bias                                                      | Authors' judgement | Support for judgement                   |
|-----------------------------------------------------------|--------------------|-----------------------------------------|
| Random sequence generation (selection bias)               | High risk          | non-randomization                       |
| Allocation concealment (selection bias)                   | Unclear risk       | non-randomization                       |
| Blinding of participants and personnel (performance bias) | High risk          | open label                              |
| Blinding of outcome assessment (detection bias)           | High risk          | open label                              |
| Incomplete outcome data (attrition bias)                  | Low risk           | data is recorded for all patients       |
| Selective reporting (reporting bias)                      | Low risk           | all prespecified outcomes were reported |
| Other bias                                                | High risk          | 26 patients in the study                |

*Zuijdgeest-Van Leeuwen et al. 2000*

|                      |                                                                                                                                                                                        |
|----------------------|----------------------------------------------------------------------------------------------------------------------------------------------------------------------------------------|
| <b>Methods</b>       | double-blind, randomized trial                                                                                                                                                         |
| <b>Participants</b>  | 33 patients                                                                                                                                                                            |
| <b>Interventions</b> | EPA-EE (6 g/d) or placebo (oleic acid (OA)-EE; 6 g/d) for seven days                                                                                                                   |
| <b>Outcomes</b>      | whole-body lipolysis and palmitic acid release were measured in the overnight fasting state, changes in weight, plasma free fatty acids, triacylglycerols, CRP, albumin and prealbumin |
| <b>Notes</b>         |                                                                                                                                                                                        |

## Risk of bias table

| Bias                                                      | Authors' judgement | Support for judgement             |
|-----------------------------------------------------------|--------------------|-----------------------------------|
| Random sequence generation (selection bias)               | Unclear risk       | not specified                     |
| Allocation concealment (selection bias)                   | Low risk           | random allocation                 |
| Blinding of participants and personnel (performance bias) | Low risk           | double blind                      |
| Blinding of outcome assessment (detection bias)           | Low risk           | double blind                      |
| Incomplete outcome data (attrition bias)                  | Low risk           | data is recorded for all patients |

|                                      |           |                                         |
|--------------------------------------|-----------|-----------------------------------------|
| Selective reporting (reporting bias) | Low risk  | all prespecified outcomes were reported |
| Other bias                           | High risk | 17 patients in the treatment arm        |

*Footnotes*

## Characteristics of excluded studies

*Footnotes*

## Characteristics of studies awaiting classification

*Footnotes*

## Characteristics of ongoing studies

*Footnotes*
